# Supplementary material for: Tetrapeptide Ac-HAEE-NH2 Protects α4β2 nAChR from Inhibition by Aβ
Source: MDPI journal article supplement (doi:10.3390/ijms21176272), 2020-08-29
Supplement: s1 [file s1]

## Supplementary Figures

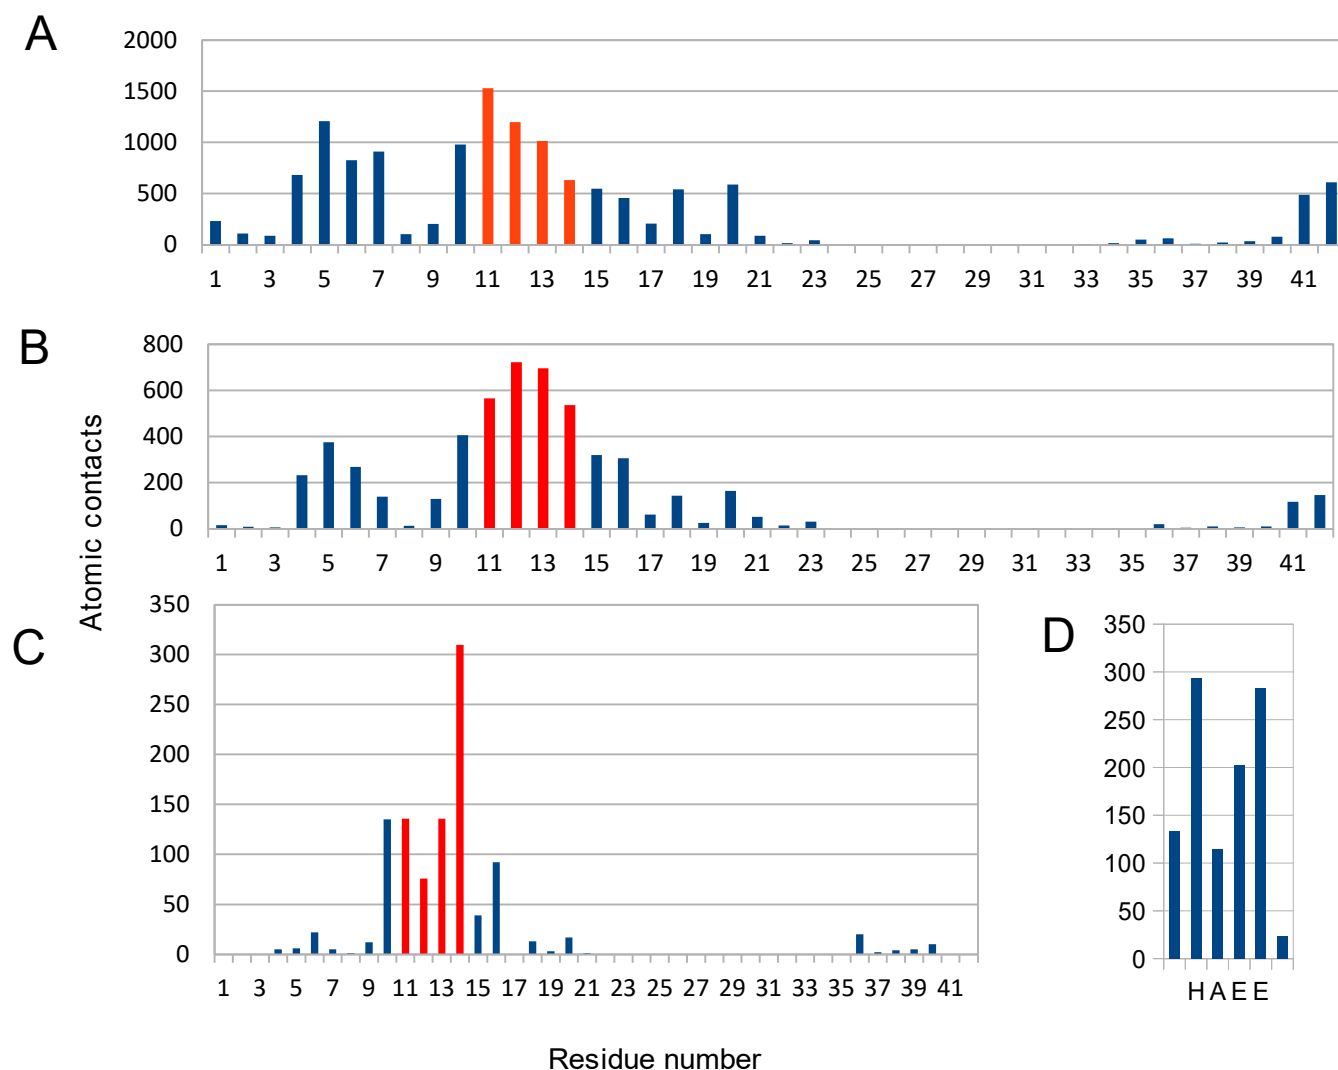

Figure S1. Docking results of Ac-HAEE-NH<sub>2</sub> to A $\beta$ <sub>42</sub>. Horizontally represented are amino acid residues 1-42 of A $\beta$ <sub>42</sub>, vertically - the total number of atomic contacts of Ac-HAEE-NH<sub>2</sub> in all models with each residue. Bars above the <sup>11</sup>EVHH<sup>14</sup> site are highlighted in red. A - Fullblind docking, B - Targeted global docking; C, D - Binding information for 8 selected docking structures of Ac-HAEE-NH<sub>2</sub> to A $\beta$ <sub>42</sub>.

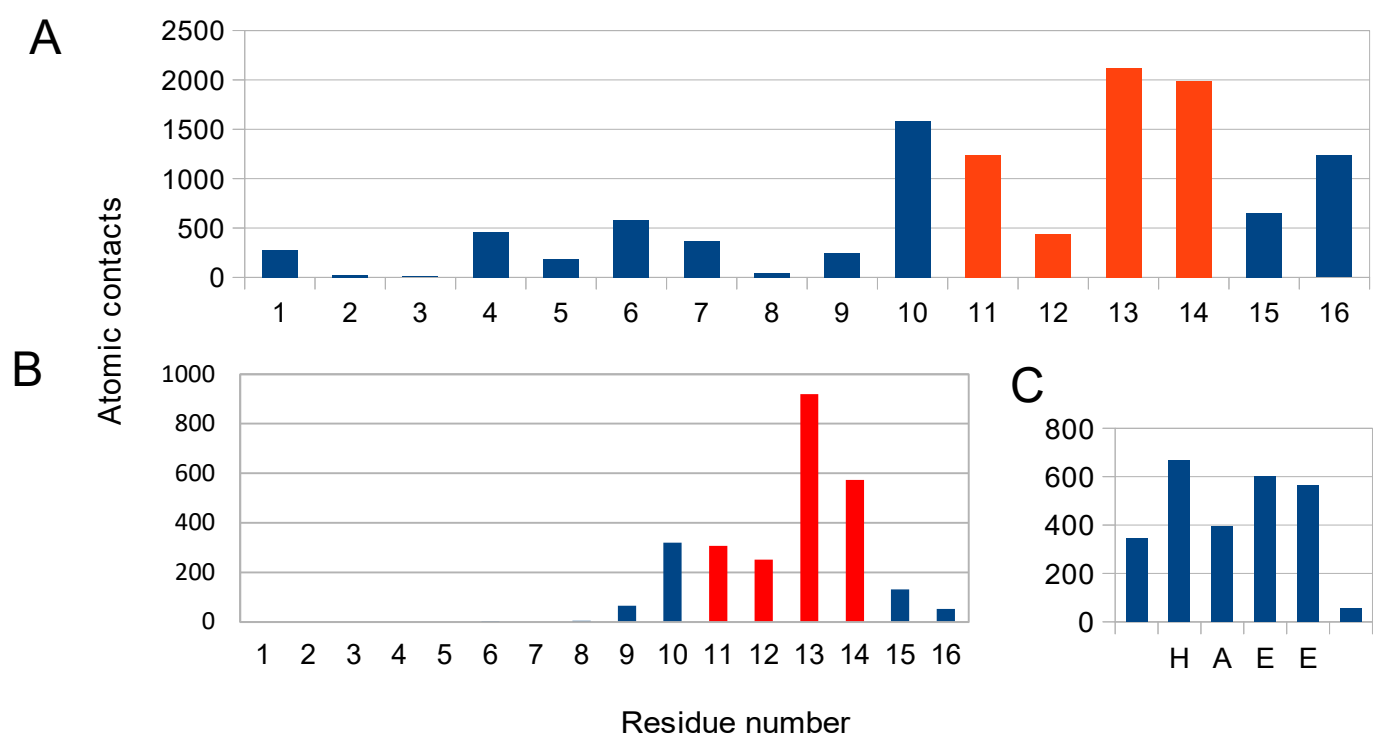

Figure S2. Docking results of Ac-HAEE-NH<sub>2</sub> to Aβ<sub>16</sub>. Horizontally represented are amino acid residues 1-16 of Aβ<sub>16</sub>, vertically - the total number of atomic contacts of Ac-HAEE-NH<sub>2</sub> in all models with each residue. Bars above the <sup>11</sup>EVHH<sup>14</sup> site are highlighted in red. A - Targeted docking of Ac-HAEE-NH<sub>2</sub> to Aβ<sub>16</sub>, B, C - Binding information for 22 selected structures of Ac-HAEE-NH<sub>2</sub> docking to Aβ<sub>16</sub>.

## Supplementary Tables

Table S1. The peptides with predicted charge complementarity (both in a parallel and anti-parallel orientation) for <sup>11</sup>EVHH<sup>14</sup> region of A $\beta$  tested in the direct binding assay. The peptides with the strongest binding to A $\beta$ <sub>16</sub> by K<sub>d</sub> are highlighted in yellow

| Number | Sequence                | Number | Sequence                |
|--------|-------------------------|--------|-------------------------|
| #1     | Ac-HADD-NH <sub>2</sub> | #13    | Ac-HADE-NH <sub>2</sub> |
| #2     | Ac-DDAH-NH <sub>2</sub> | #14    | Ac-EDAH-NH <sub>2</sub> |
| #3     | Ac-KADD-NH <sub>2</sub> | #15    | Ac-KADE-NH <sub>2</sub> |
| #4     | Ac-DDAK-NH <sub>2</sub> | #16    | Ac-EDAK-NH <sub>2</sub> |
| #5     | Ac-RADD-NH <sub>2</sub> | #17    | Ac-RADE-NH <sub>2</sub> |
| #6     | Ac-DDAR-NH <sub>2</sub> | #18    | Ac-EDAR-NH <sub>2</sub> |
| #7     | Ac-HAED-NH <sub>2</sub> | #19    | Ac-HAEE-NH <sub>2</sub> |
| #8     | Ac-DEAH-NH <sub>2</sub> | #20    | Ac-EEAH-NH <sub>2</sub> |
| #9     | Ac-KAED-NH <sub>2</sub> | #21    | Ac-KAEE-NH <sub>2</sub> |
| #10    | Ac-DEAK-NH <sub>2</sub> | #22    | Ac-EEAK-NH <sub>2</sub> |
| #11    | Ac-RAED-NH <sub>2</sub> | #23    | Ac-RAEE-NH <sub>2</sub> |
| #12    | Ac-DEAR-NH <sub>2</sub> | #24    | Ac-EEAR-NH <sub>2</sub> |

Tables S2. Kinetic parameters for interaction of immobilized A $\beta$ <sub>16</sub> with different charge-complementary peptides at 25 °C in 10 mM HEPES, pH 6.8. The calculation of kinetic parameters for all the analytes was impossible due to weak binding for some peptides. The most potent binders are highlighted in yellow. Data are presented as a mean $\pm$ SD of three independent measurements.

| Peptide sample              | $K_d \times 10^4$ M | $K_a \times 10^{-2}$ M <sup>-1</sup> | $k_{on} \times M^{-1}s^{-1}$ | $k_{off} \times 10^{-3} s^{-1}$ |
|-----------------------------|---------------------|--------------------------------------|------------------------------|---------------------------------|
| #1                          | 32.5 $\pm$ 0.9      | 3.08 $\pm$ 0.08                      | 3.20 $\pm$ 0.08              | 10.40 $\pm$ 0.02                |
| #2                          | 297 $\pm$ 8         | 3.37 $\pm$ 0.09                      | 0.52 $\pm$ 0.01              | 15.4 $\pm$ 0.1                  |
| #4                          | 13.7 $\pm$ 0.5      | 7.3 $\pm$ 0.3                        | 4.57 $\pm$ 0.09              | 6.2 $\pm$ 0.1                   |
| Ac-RADD-NH <sub>2</sub> #5  | 0.13 $\pm$ 0.02     | 800 $\pm$ 100                        | 18.5 $\pm$ 0.1 e1            | 0.24 $\pm$ 0.04                 |
| #9                          | 33 $\pm$ 7          | 3.1 $\pm$ 0.6                        | 5.7 $\pm$ 0.9                | 19 $\pm$ 1                      |
| #12                         | 19.8 $\pm$ 0.7      | 5.1 $\pm$ 0.2                        | 3.58 $\pm$ 0.08              | 7.09 $\pm$ 0.09                 |
| #15                         | 45 $\pm$ 3          | 2.2 $\pm$ 0.1                        | 2.2 $\pm$ 0.1                | 9.6 $\pm$ 0.2                   |
| #16                         | 710 $\pm$ 50        | 0.141 $\pm$ 0.009                    | 0.136 $\pm$ 0.006            | 9.7 $\pm$ 0.2                   |
| #18                         | 350 $\pm$ 30        | 0.28 $\pm$ 0.03                      | 0.13 $\pm$ 0.01              | 4.7 $\pm$ 0.1                   |
| Ac-HAEE-NH <sub>2</sub> #19 | 0.9 $\pm$ 0.3       | 110 $\pm$ 40                         | 0.37 $\pm$ 0.05              | 0.035 $\pm$ 0.008               |
| Ac-RAEE-NH <sub>2</sub> #23 | 77 $\pm$ 6          | 1.3 $\pm$ 0.1                        | 1.5 $\pm$ 0.1                | 11.20 $\pm$ 0.08                |
